# Supplementary material for: Genome-Wide Identification of the Ferric Chelate Reductase (FRO) Gene Family in Peanut and Its Diploid Progenitors: Structure, Evolution, and Expression Profiles
Source: MDPI journal article supplement (doi:10.3390/plants13030418), 2024-01-31
Supplement: s1 [file s1]

**TM1**

|          |                                                                                          |    |
|----------|------------------------------------------------------------------------------------------|----|
| AtFRO2   | -----MEIEKSNNGGNSPAGESFEKMDIKGVTKFLMMVIFLCITIMLWIMMPTLT                                  | 76 |
| AdFRO2.1 | -----MGDQKIVKRSPSQVKYDMILYARLVVVLVLLGWIFWIMMPTSTFRQTLWPLHLRAKTTTSTYFGSQGTTL              | 72 |
| AdFRO7   | MEKETVDNTPLLSPTKEKTPSSSSSS-SSSFLVSATKWVLYLCIIFIIGWAGFIFLMPPEESVNLMS--KWINLTGNPLGTAGSIFM  | 87 |
| AdFRO8   | -----MASSTLLAIVKLLMLILICAGWVALWILKPTQIWRKWK--VAEESANNTIFGGYGLNFA                         | 57 |
| AhFRO2.1 | -----MGDKKIVKRSPSQVKYDMILYARLVVVLVLLGWIFWIMMPTSTFRQTLWPLHLRAKTTTSTYFGSQGTTL              | 72 |
| AhFRO2.2 | --MNTNRRRSEQVTNQEMDEEVLKSPSQEKYGRAQFARLVVVLVFLAVFVWVWVAPDITYKQIWLPLQKAKINS-SYFGKQCATLL   | 87 |
| AhFRO2.3 | -----MGDQKILKRSPSQVKYDMILYARLVVVLVLLGWIFWIMMPTSTFRQTLWPLHLRAKTTTSTYFGSQGTTL              | 72 |
| AhFRO2.5 | --MNTNRRRSEQVTNQEMDEEVLKSPSQEKYGRAQFARLVVVLVFLAVFVWVWVAPDITYKQIWLPLQKAKINS-SYFGKQCATLL   | 87 |
| AhFRO7.1 | MEKETVDSTPLLSPTKEKTPSSSSS-SSSFLVSATKWVLYLCIIFIIGWAGFIFLMPPEESVNLMS--KWINLTGNPLGTAGSIFM   | 84 |
| AhFRO7.2 | MEKETVDNTPLLSPTKEKTPSSSSSSSSSS-FLVSATKSVLYLCIIFIIGWAGFIFLEPEESVNLMS--KWINLTGRNPLGTAGSIFM | 87 |
| AhFRO8.1 | -----MASSTLLAIVKLLMLILICAGWVALWILKPTQIWRKWK--VAEESANNTIFGGYGLNFA                         | 57 |
| AhFRO8.2 | -----MASSTLLAIVKLLMLILICAGWVALWILKPTQIWRKWK--VAEESANNTIFGGYGLNFA                         | 57 |
| AiFRO2   | --MNTNRRRSEQVTNQEMDEEVLKSPSQEKYGRAQFARLVVVLVFLAVFVWVWVAPDITYKQIWLPLQKAKINS-SYFGKQCATLL   | 87 |
| AiFRO7   | MEKETVDNTPLLSPIKEKTPSSSSSSSSSS-FLVSATKSVLYLCIIFIIGWAGFIFLEPEESVNLMS--KWINLTGRNPLGTAGSIFM | 88 |
| AiFRO8   | -----MASSTLLAIVKLLMLILICAGWVALWILKPTQIWRKWK--VAEESANNTIFGGYGLNFA                         | 57 |

|          |                                         |                                                                |            |  |
|----------|-----------------------------------------|----------------------------------------------------------------|------------|--|
|          | <b>TM2</b>                              |                                                                | <b>TM3</b> |  |
| AtFRO2   | MYMFPMVAVCLGCVYIHFKNRKSPHHIR----        | ETKGGVWSKLKRPILVKGLGIVSVTEITFLAMFVALLLCFITYLRNSFATITP          | 161        |  |
| AdFRO2.1 | IYIFPVLFITASLGCITYIHVKKANDSNM           | RCDNKNDAGKGKVTWKRPFIVKGGLGIVSGTEVAMLLMFIGLLVWSFATYLHNFFALITR   | 162        |  |
| AdFRO7   | LFAPILITAFLAIAAYILS-----                | GEHIPEKKSTKYPSPFRWTFPVIKGGFGVVSATELIGIVLFSAYVIFAIYN---YTMRALAS | 168        |  |
| AdFRO8   | VYIFPIIIVGIIIGLLFLDK-----               | AA---QSRSSRTSSISSSPVVSFGLILSSIEILVILLFILFLAWTYARISNDFKKLLP     | 138        |  |
| AhFRO2.1 | IYIFPVLFITASLGCITYIHVKKANDSNM           | RCDNKNDAGKGKVTWKRPFIVKGGLGIVSGTEVAMLLMFIGLLVWSFATYLHNFFALITQ   | 162        |  |
| AhFRO2.2 | LFVPILFIAVLGSIYIHAKKYNFYKMERKNGKKEG--VF | GKRPLVVRGGLGIVSGTELALLFMFIVLLVWSFSNYLNNSFAKISQ                 | 175        |  |
| AhFRO2.3 | IYIFPVLFITASLGCITYIHVKKANDSNM           | RCDNRNDKGGKETWKRPFIVKGGLGIVSGTEVAMLLMFIGLLVWSFASYLHNFFALITQ    | 162        |  |
| AhFRO2.5 | LFVPILFIAVLGSIYIHAKKYNFYKIERKNGKKEG--VF | GKRPLVVRGGLGIVSGTELALLFMFIVLLVWSFSNYLNNSFAKISQ                 | 175        |  |
| AhFRO7.1 | LFAPILITAFLAIAAYILS-----                | GEHIPEKKSTKYPSPFRWTFPVIKGGFGVVSATELIGIVLFSAYVIFAIYN---YTMRALAS | 165        |  |
| AhFRO7.2 | LYAPILITAFLAIAAYILS-----                | GEHIPEKKSTKYPSPFRWTFPVIKGGFGVVSATELIGIVLFSAYVIFAIYN---YTMRALAS | 168        |  |
| AhFRO8.1 | VYIFPIIIVGIIIGLLFLDK-----               | AA---QSRSSRTSSISSSPVVSFGLILSSIEILVILLFILFLAWTYARISNDFKKLLP     | 138        |  |
| AhFRO8.2 | VYIFPIIIVGIIIGLLFLDK-----               | AA---QSRSSRTSSISSSPVVSFGLILSSIEILVILLFILFLAWTYARISNDFKKLLP     | 138        |  |
| AiFRO2   | LFVPILFIAVLGSIYIHAKKYNFYKIERKNGKKEG--VF | GKRPLVVRGGLGIVSGTELALLFMFIVLLVWSFSNYLNNSFAKISQ                 | 175        |  |
| AiFRO7   | LYAPILITAFLAIAAYILS-----                | GEHIPEKKSTKYPSPFRWTFPVIKGGFGVVSATELIGIVLFSAYVIFAIYN---YTMRALAS | 169        |  |
| AiFRO8   | VYIFPIIIVGIIIGLLFLDK-----               | AA---QSRSSRTSSISSSPVVSFGLILSSIEILVILLFILFLAWTYARISNDFKKLLP     | 138        |  |

|          |                          |                                                                   |            |  |
|----------|--------------------------|-------------------------------------------------------------------|------------|--|
|          | <b>TM4</b>               | <b>Ferric reduct</b>                                              | <b>TM5</b> |  |
| AtFRO2   | KSAAAHDESILQAKLESALRLGL  | IGNICLAFLFIPVARSSLLPAMGLTSESSIKYHIWLGHMVMALFTVHGLCYIYWASMH-EISOM  | 250        |  |
| AdFRO2.1 | KSAAQFGVKWELKLEDAGLILGL  | IGNICLAFLFIPVSRASPVLPLGLTSESCIKYHIWLGHVLTFFTAHGSIYIIFWAATN-QISOM  | 251        |  |
| AdFRO7   | --PSHHHLDRRIFMLEIILGRFGG | GLMCMALFLFPVSR-SVLLRYIDIPPEHATRYHVWLGHLTMAFLTTHGLLYCVAWAMDGRIVEEL | 256        |  |
| AdFRO8   | --DKSLKLNWLQKYLRIATRFGL  | LAEEACLALLLPILRLALFRILGIQEASVRYHTWLGTAMIFFAAIHGASTCFVWGVSHHIQKEI  | 226        |  |
| AhFRO2.1 | KSAAQFGVKWELKLEDAGLILGL  | IGNICLAFLFIPVSRASPVLPLGLTSESCIKYHIWLGHVLTFFTAHGSIYIIFWAATN-QISOM  | 251        |  |
| AhFRO2.2 | KSAAEDGEKVWQKLDKLSALMLGK | VGNICLAMLFPVTRSSLLPLVGLKSESCIKYHIWLNMLMTIFTAHGLCYIYWAVTN-QLSKM    | 264        |  |
| AhFRO2.3 | KSAAQFGVKWELKLEDAGLILGL  | IGNICLAFLFIPVSRASPVLPLGLTSESCIKYHIWLGHVLTFFTAHGVSXYIIFWAATN-QISOM | 251        |  |
| AhFRO2.5 | KSAAEDGEKVWQKLDKLSALMLGK | VGNICLAMLFPVTRSSLLPLVGLKSESCIKYHIWLNMLMTIFTAHGLCYIYWAVTN-QLSKM    | 264        |  |
| AhFRO7.1 | --PSHHHLDRRIFMLEIILGRFGG | GLMCMALFLFPVSR-SVLLRYIDIPPEHATRYHVWLGHLTMAFLTTHGLLYCVAWAMDGRIVEEL | 253        |  |
| AhFRO7.2 | --PSHHHLDRRIFMLEIILGRFGG | GLMCMALFLFPVSR-SVLLRYIDIPPEHATRYHVWLGHLTMAFLTTHGLLYCVAWAMDGRIVEEL | 256        |  |
| AhFRO8.1 | --DKSLKLNWLQKYLRIATRFGL  | LAEEACLALLLPILRLALFRILGIQEASVRYHTWLGTAMIFFAAIHGASTCFVWGVSHHIQKEI  | 226        |  |
| AhFRO8.2 | --DKSLKLNWLQKYLRIATRFGL  | LAEEACLALLLPILRLALFRILGIQEASVRYHTWLGTAMIFFAAIHGASTCFVWGVSHHIQKEI  | 226        |  |
| AiFRO2   | KSAAEDGEKVWQKLDKLSALMLGK | VGNICLAMLFPVTRSSLLPLVGLKSESCIKYHIWLNMLMTIFTAHGLCYIYWAVTN-QLSKM    | 264        |  |
| AiFRO7   | --PSHHHLDRRIFMLEIILGRFGG | GLMCMALFLFPVSR-SVLLRYIDIPPEHATRYHVWLGHLTMAFLTTHGLLYCVAWAMDGRIVEEL | 257        |  |
| AiFRO8   | --DKSLKLNWLQKYLRIATRFGL  | LAEEACLALLLPILRLALFRILGIQEASVRYHTWLGTAMIFFAAIHGASTCFVWGVSHHIQKEI  | 226        |  |

|          |                          |                                                                       |     |
|----------|--------------------------|-----------------------------------------------------------------------|-----|
|          | <b>TM6</b>               | <b>TM7</b>                                                            |     |
| AtFRO2   | IMWDTKGVSNLAGEIALAAGLVMA | TYPKIRRRFEVFFYTHLYITFVLVFIHVGISFSFIALPGFYIFLVDRLRFLQSRNVRLI           | 340 |
| AdFRO2.1 | VKWEKIGISNVAGEISL        | CGLILWATIPGIRRRFELFFYAHYLYIFFMFIHFIHVGISYASIMLPGFYIFMVDRLRFLQSRTHIHLV | 341 |
| AdFRO7   | IQWKDIGVANLPGVIAL        | AGLFMWISLPGVRTWNFELFFYTHQLYITFVVLALHVGDFVFTMAAGGIFLILDRFLRFLQSRRTVKV  | 346 |
| AdFRO8   | WKQSTGRIYLAGAITL         | TGLVIYISLPGIIRRMKFEIFYTHHLYITFVLVFIHVGISYACIMLPGFYIFLVDRLRFLQSRQARLV  | 316 |
| AhFRO2.1 | VKWEKIGISNVAGEISL        | CGLILWATIPGIRRRFELFFYAHYLYIFFMFIHFIHVGISYASIMLPGFYIFMVDRLRFLQSRTHIHLV | 341 |
| AhFRO2.2 | LEWKKTGISNVAGEISL        | IGLLMWITFPIIRRKAFELFFYTHHLYITFVLVFIHVGISYACIMLPGFYIFLVDRLRFLQSRQARLV  | 354 |
| AhFRO2.3 | VKWEKIGISNVAGEISL        | CGLILWATIPGIRRKFEFFYAHYLYIFFMFIHFIHVGISYASIMLPGFYIFMVDRLRFLQSRTHVHLV  | 341 |
| AhFRO2.5 | LEWKKTGISNVAGEISL        | IGLLMWITFPIIRRKAFELFFYTHHLYITFVLVFIHVGISYACIMLPGFYIFLVDRLRFLQSRQARLV  | 354 |
| AhFRO7.1 | IQWKDIGVANLPGVIAL        | AGLFMWISLPGVRTWNFELFFYTHQLYITFVVLALHVGDFVFTMAAGGIFLILDRFLRFLQSRRTVKV  | 343 |
| AhFRO7.2 | IQWKDIGVANLPGVIAL        | AGLFMWISLPGVRTWNFELFFYTHQLYITFVVLALHVGDFVFTMAAGGIFLILDRFLRFLQSRRTVKV  | 346 |
| AhFRO8.1 | WKQSTGRIYLAGAITL         | TGLVIYISLPGIIRRMKFEIFYTHHLYITFVLVFIHVGISYACIMLPGFYIFLVDRLRFLQSRQARLV  | 316 |
| AhFRO8.2 | WKQSTGRIYLAGAITL         | TGLVIYISLPGIIRRMKFEIFYTHHLYITFVLVFIHVGISYACIMLPGFYIFLVDRLRFLQSRQARLV  | 316 |
| AiFRO2   | LEWKKTGISNVAGEISL        | IGLLMWITFPIIRRKAFELFFYTHHLYITFVLVFIHVGISYACIMLPGFYIFLVDRLRFLQSRQARLV  | 354 |
| AiFRO7   | IQWKDIGVANLPGVIAL        | AGLFMWISLPGVRTWNFELFFYTHQLYITFVVLALHVGDFVFTMAAGGIFLILDRFLRFLQSRRTVKV  | 347 |
| AiFRO8   | WKQSTGRIYLAGAITL         | TGLVIYISLPGIIRRMKFEIFYTHHLYITFVLVFIHVGISYACIMLPGFYIFLVDRLRFLQSRQARLV  | 316 |

|          |                          |                                                                       |     |
|----------|--------------------------|-----------------------------------------------------------------------|-----|
|          | <b>TM8</b>               | <b>FAD binding 8</b>                                                  |     |
| AtFRO2   | AARILPSDTMELTFKNSKLVYSP  | TSIMFVNIPSTSKLQWHPFTITSSSKLEPEKLSIVIKKEGKWTSLHQRLLSSSD-----QIDRLAV    | 425 |
| AdFRO2.1 | SARVLPCDTIELNFSKTHE      | SYTPTSVMFINIPSTSKLQWHPFTITSSSKWEPEKLSVVIKSEGTWSKKLYQMLSTP-----TIDHIDV | 425 |
| AdFRO7   | SSRCLPCGTVELVLSKPPNRYNAL | SFIIFQIRELSWLQWHPFSVSSSPLDGKNHPLAVLIKVLGKWTENLRDRITDADEPKDLSVKTITA    | 436 |
| AdFRO8   | SARTFPSKAVEIILPKDPWLYK   | YMATSVIFMKIPALSHLQWHSFSITSSSRAENQTMVVIKSEGWTSNSLYDLIQAEIEKGADKRKGIPV  | 406 |
| AhFRO2.1 | SARVLPCDTIELNFSKTHE      | SYTPTSVMFINIPSTSKLQWHPFTITSSSKLEPEKLSVVIKSEGTWSKKLYQMLSTP-----TIDHIDV | 425 |
| AhFRO2.2 | SARVLPCDTIELNFSKTHE      | SYTPTSVMFINIPSTSKLQWHPFTITSSSKLEPEKLSVVIKSEGTWSKKLYQMLSTP-----TIDHIDV | 439 |
| AhFRO2.3 | SARVLPCDTIELNFSKTHE      | SYTPTSVMFINIPSTSKLQWHPFTITSSSKLEPEKLSVVIKSEGTWSKKLYQMLSTP-----TIDHIDV | 425 |
| AhFRO2.5 | SARVLPCDTIELNFSKTHE      | SYTPTSVMFINIPSTSKLQWHPFTITSSSKLEPEKLSVVIKSEGTWSKKLYQMLSTP-----TIDHIDV | 439 |
| AhFRO7.1 | SSRCLPCGTVELVLSKPPNRYNAL | SFIIFQIRELSWLQWHPFSVSSSPLDGKNHPLAVLIKVLGKWTENLRDRITDADEPKDLSVKTITA    | 433 |
| AhFRO7.2 | SSRCLPCGTVELVLSKPPNRYNAL | SFIIFQIRELSWLQWHPFSVSSSPLDGKNHPLAVLIKVLGKWTENLRDRITDADEPKDLSVKTITA    | 436 |
| AhFRO8.1 | SARTFPSKAVEIILPKDPWLYK   | YMATSVIFMKIPALSHLQWHSFSITSSSRAENQTMVVIKSEGWTSNSLYDLIQAEIEKGADKRKGIPV  | 406 |
| AhFRO8.2 | SARTFPSKAVEIILPKDPWLYK   | YMATSVIFMKIPALSHLQWHSFSITSSSRAENQTMVVIKSEGWTSNSLYDLIQAEIEKGADKRKGIPV  | 406 |
| AiFRO2   | SARVLPCDTIELNFSKTHE      | SYTPTSVMFINIPSTSKLQWHPFTITSSSKLEPEKLSVVIKSEGTWSKKLYQMLSTP-----TIDHIDV | 439 |
| AiFRO7   | SSRCLPCGTVELVLSKPPNRYNAL | SFIIFQIRELSWLQWHPFSVSSSPLDGKNHPLAVLIKVLGKWTENLRDRITDADEPKDLSVKTITA    | 437 |
| AiFRO8   | SARTFPSKAVEIILPKDPWLYK   | YMATSVIFMKIPALSHLQWHSFSITSSSRAENQTMVVIKSEGWTSNSLYDLIQAEIEKGADKRKGIPV  | 406 |
